# Supplementary material
Source: MDPI journal article supplement (https://www.mdpi.com/1999-4907/14/5/904)
Supplement: s1 [file s1]

## Supplementary Materials

**Table S1.** Detailed data for the 47 nationalities of the participants. We include information for native language, gender and age of the respondents, and setting where the activity was performed.

| Nationality | N   | %    | Language                     | Gender               | Age                                                            | Setting                                   |
|-------------|-----|------|------------------------------|----------------------|----------------------------------------------------------------|-------------------------------------------|
| Albania     | 5   | 0.4  | Italian: 1<br>English: 4     | Women: 2<br>Men: 3   | 18-31: 3<br>32-45: 1<br>46-59: 1                               | Natural: 5                                |
| Andorra     | 1   | 0.1  | Spanish: 1                   | Men: 1               | 60-79: 1                                                       | Urban park: 1                             |
| Argentina   | 84  | 7.4  | Spanish: 73<br>English: 11   | Women: 66<br>Men: 18 | 18-31: 11<br>32-45: 23<br>46-59: 27<br>60-79: 22<br>Unknown: 1 | Natural: 79<br>Urban park: 5              |
| Armenia     | 1   | 0.1  | English: 1                   | Women: 1             | 60-79: 1                                                       | Natural: 1                                |
| Australia   | 1   | 0.1  | English: 1                   | Men: 1               | 32-45: 1                                                       | Natural: 1                                |
| Austria     | 1   | 0.1  | Spanish: 1                   | Women: 1             | 60-79: 1                                                       | Natural: 1                                |
| Bangladesh  | 1   | 0.1  | English: 1                   | Women: 1             | 18-31: 1                                                       | Urban park: 1                             |
| Belgium     | 3   | 0.3  | English: 3                   | Women: 2<br>Men: 1   | 32-45: 1<br>46-59: 1<br>60-79: 1                               | Natural: 3                                |
| Brazil      | 15  | 1.3  | Portuguese: 14<br>Spanish: 1 | Women: 13<br>Men: 2  | 18-31: 1<br>32-45: 5<br>46-59: 5<br>60-79: 4                   | Natural: 2<br>Urban park: 8<br>Other: 5   |
| Canada      | 29  | 2.5  | English: 29                  | Women: 20<br>Men: 9  | 18-31: 4<br>32-45: 8<br>46-59: 9<br>60-79: 6<br>Unknown: 2     | Natural: 16<br>Urban park: 13             |
| Chile       | 124 | 10.9 | Spanish: 124                 | Women: 79<br>Men: 45 | 18-31: 45<br>32-45: 48<br>46-59: 22<br>60-79: 9                | Natural: 83<br>Urban park: 39<br>Other: 2 |
| China       | 14  | 1.2  | English: 14                  | Women: 12<br>Men: 2  | 18-31: 4<br>32-45: 6<br>46-59: 2<br>Unknown: 2                 | Natural: 6<br>Urban park: 8               |
| Colombia    | 12  | 1.1  | Spanish: 12                  | Women: 11<br>Men: 1  | 18-31: 3<br>32-45: 7<br>46-59: 1<br>60-79: 1                   | Natural: 12                               |
| Costa Rica  | 8   | 0.7  | Spanish: 8                   | Women: 12<br>Men: 2  | 18-31: 4<br>46-59: 2<br>60-79: 2                               | Natural: 8                                |
| Croatia     | 14  | 1.2  | English: 14                  | Women: 12<br>Men: 2  | 32-45: 9<br>46-59: 4<br>60-79: 1                               | Natural: 11<br>Urban park: 2<br>Other: 1  |

| Nationality     | N   | %    | Language                                              | Gender                                | Age                                                            | Setting                                    |
|-----------------|-----|------|-------------------------------------------------------|---------------------------------------|----------------------------------------------------------------|--------------------------------------------|
| Czech Republic  | 1   | 0.1  | English: 1                                            | Women: 1                              | 18-31: 1                                                       | Natural: 1                                 |
| France          | 69  | 6.0  | Spanish: 4<br>French: 64<br>English: 1                | Women: 54<br>Men: 14<br>Non-binary: 1 | 18-31: 5<br>32-45: 27<br>46-59: 18<br>60-79: 18<br>Unknown: 1  | Natural: 63<br>Urban park: 4<br>Other: 2   |
| Germany         | 7   | 0.6  | French: 1<br>English: 6                               | Women: 6<br>Men: 1                    | 18-31: 1<br>32-45: 3<br>46-59: 2<br>60-79: 1                   | Natural: 5<br>Urban park: 2                |
| Greece          | 1   | 0.1  | English: 1                                            | Women: 1<br>Men: 0                    | 46-59: 1                                                       | Natural: 1                                 |
| Hungary         | 1   | 0.1  | English: 1                                            | Women: 1<br>Men: 0                    | 32-45: 1                                                       | Natural: 1                                 |
| India           | 22  | 1.9  | English: 22                                           | Women: 21<br>Men: 1                   | 32-45: 14<br>46-59: 7<br>Unknown: 1                            | Natural: 4<br>Urban park: 11<br>Other: 7   |
| Ireland         | 15  | 1.3  | English: 15                                           | Women: 11<br>Men: 4                   | 32-45: 5<br>46-59: 4<br>60-79: 5<br>Unknown: 1                 | Natural: 10<br>Urban park: 4<br>Other: 1   |
| Italy           | 132 | 11.6 | Spanish: 4<br>French: 2<br>Italian: 121<br>English: 5 | Women: 97<br>Men: 35                  | 18-31: 24<br>32-45: 33<br>46-59: 50<br>60-79: 13<br>Unknown: 3 | Natural: 105<br>Urban park: 22<br>Other: 5 |
| Ivory Coast     | 2   | 0.2  | English: 2                                            | Men: 2                                | 32-45: 2                                                       | Urban park: 1<br>Other: 1                  |
| Japan           | 1   | 0.1  | English: 1                                            | Women: 1                              | 32-45: 1                                                       | Natural: 1                                 |
| Latvia          | 29  | 2.5  | English: 29                                           | Women: 22<br>Men: 7                   | 18-31: 14<br>32-45: 12<br>46-59: 2<br>Unknown: 1               | Natural: 29                                |
| Lithuania       | 22  | 1.9  | English: 22                                           | Women: 16<br>Men: 6                   | 18-31: 11<br>32-45: 7<br>46-59: 2<br>60-79: 1<br>Unknown: 1    | Natural: 15<br>Urban park: 5<br>Other: 2   |
| Mexico          | 49  | 4.3  | Spanish: 46<br>English: 3                             | Women: 33<br>Men: 15<br>Non-binary: 1 | 18-31: 8<br>32-45: 18<br>46-59: 15<br>60-79: 8                 | Natural: 34<br>Urban park: 15              |
| Netherlands     | 23  | 2.0  | Italian: 1<br>English: 22                             | Women: 20<br>Men: 3                   | 18-31: 14<br>32-45: 4<br>46-59: 4<br>60-79: 1                  | Natural: 20<br>Urban park: 3               |
| North Macedonia | 1   | 0.1  | English: 1                                            | Women: 1<br>Men: 0                    | 46-59: 1                                                       | Other: 1                                   |

| Nationality    | N           | %          | Language                               | Gender                                 | Age                                                            | Setting                                    |
|----------------|-------------|------------|----------------------------------------|----------------------------------------|----------------------------------------------------------------|--------------------------------------------|
| Peru           | 15          | 1.3        | Spanish: 15                            | Women: 11<br>Men: 4                    | 18-31: 3<br>32-45: 2<br>46-59: 9<br>60-79: 1                   | Natural: 8<br>Urban park: 5<br>Other: 2    |
| Philippines    | 1           | 0.1        | English: 1                             | Women: 1                               | 46-59: 1                                                       | Other: 1                                   |
| Poland         | 40          | 3.5        | Spanish: 1<br>English: 9<br>Polish: 30 | Women: 33<br>Men: 6<br>Non-binary: 1   | 18-31: 6<br>32-45: 28<br>46-59: 3<br>60-79: 2<br>Unknown: 1    | Natural: 34<br>Urban park: 6               |
| Portugal       | 35          | 3.1        | Portuguese: 33<br>Spanish: 2           | Women: 26<br>Men: 9                    | 32-45: 9<br>46-59: 17<br>60-79: 9                              | Natural: 21<br>Urban park: 13<br>Other: 1  |
| Romania        | 22          | 1.9        | English: 22                            | Women: 22                              | 32-45: 21<br>60-79: 1                                          | Natural: 1<br>Urban park: 21               |
| Russia         | 1           | 0.1        | English: 1                             | Women: 1                               | 60-79: 1                                                       | Urban park: 1                              |
| Slovenia       | 2           | 0.2        | English: 2                             | Women: 1<br>Men: 1                     | 32-45: 2                                                       | Natural: 1<br>Urban park: 1                |
| South Africa   | 4           | 0.4        | English: 4                             | Women: 3<br>Men: 1                     | 18-31: 2<br>46-59: 1<br>60-79: 1                               | Natural: 2<br>Urban park: 2                |
| Spain          | 167         | 14.6       | Spanish: 166<br>English: 1             | Women: 123<br>Men: 40<br>Non-binary: 4 | 18-31: 11<br>32-45: 58<br>46-59: 61<br>60-79: 36<br>Unknown: 1 | Natural: 162<br>Urban park: 2<br>Other: 3  |
| Sweden         | 1           | 0.1        | English: 1                             | Women: 1                               | 60-79: 1                                                       | Urban park: 1                              |
| Switzerland    | 9           | 0.8        | French: 5<br>Italian: 4                | Women: 5<br>Men: 4                     | 32-45: 6<br>46-59: 3                                           | Natural: 9                                 |
| Turkey         | 1           | 0.1        | Polish: 1                              | Men: 1                                 | 46-59: 1                                                       | Natural: 1                                 |
| United Kingdom | 40          | 3.5        | French: 2<br>English: 38               | Women: 24<br>Men: 16                   | 18-31: 3<br>32-45: 4<br>46-59: 25<br>60-79: 8                  | Natural: 32<br>Urban park: 7<br>Other: 1   |
| United States  | 103         | 9.0        | Spanish: 3<br>English: 100             | Women: 82<br>Men: 19                   | 18-31: 19<br>32-45: 16<br>46-59: 29<br>60-79: 37<br>Unknown: 2 | Natural: 53<br>Urban park: 32<br>Other: 18 |
| Uruguay        | 6           | 0.5        | Spanish: 6                             | Women: 4<br>Men: 2                     | 18-31: 1<br>32-45: 1<br>60-79: 4                               | Natural: 4<br>Urban park: 2                |
| Venezuela      | 4           | 0.4        | Spanish: 4                             | Women: 3<br>Non-binary: 1              | 18-31: 2<br>32-45: 2                                           | Natural: 4                                 |
| Zimbabwe       | 3           | 0.3        | French: 1<br>English: 2                | Women: 3                               | 18-31: 1<br>46-59: 2                                           | Natural: 1<br>Urban park: 2                |
| <b>Total</b>   | <b>1142</b> | <b>100</b> |                                        |                                        |                                                                |                                            |

**Table S2.** Detailed data for the 35 countries where Forest bathing sessions were performed. Membership within each category of the world area factor is also indicated. We include information on native language, gender and age of the respondents, and setting where the activity was performed.

| Country    | N   | %    | World Area           | Language                  | Gender                                | Age                                                            | Setting                                   |
|------------|-----|------|----------------------|---------------------------|---------------------------------------|----------------------------------------------------------------|-------------------------------------------|
| Albania    | 9   | 0.8  | Mediterranean Europe | Italian: 4<br>English: 5  | Women: 4<br>Men: 5                    | 18-31: 6<br>32-45: 2<br>46-59: 1                               | Natural: 9                                |
| Argentina  | 85  | 7.4  | Latin America        | Spanish: 76<br>English: 9 | Women: 64<br>Men: 20<br>Non-binary: 1 | 18-31: 13<br>32-45: 22<br>46-59: 26<br>60-79: 23<br>Unknown: 1 | Natural: 83<br>Urban park: 2              |
| Belgium    | 3   | 0.3  | Northwest Europe     | English: 3                | Women: 2<br>Men: 1                    | 32-45: 1<br>46-59: 1<br>60-79: 1                               | Natural: 3                                |
| Brazil     | 14  | 1.2  | Latin America        | Portuguese: 14            | Women: 12<br>Men: 2                   | 18-31: 1<br>32-45: 4<br>46-59: 5<br>60-79: 4                   | Natural: 1<br>Urban park: 8<br>Other: 5   |
| Canada     | 28  | 2.5  | North America        | English: 28               | Women: 24<br>Men: 4                   | 18-31: 6<br>32-45: 4<br>46-59: 9<br>60-79: 6<br>Unknown: 3     | Natural: 12<br>Urban park: 16             |
| Chile      | 127 | 11.1 | Latin America        | Spanish: 127              | Women: 82<br>Men: 45                  | 18-31: 47<br>32-45: 49<br>46-59: 22<br>60-79: 9                | Natural: 86<br>Urban park: 39<br>Other: 2 |
| China      | 10  | 0.9  | Asia                 | English: 10               | Women: 7<br>Men: 3                    | 18-31: 1<br>32-45: 8                                           | Natural: 8<br>Urban park: 2               |
| Colombia   | 11  | 1.0  | Latin America        | Spanish: 11               | Women: 10<br>Men: 1                   | 18-31: 2<br>32-45: 7<br>46-59: 1<br>60-79: 1                   | Natural: 11                               |
| Costa Rica | 12  | 1.1  | Latin America        | Spanish: 8<br>English: 4  | Women: 9<br>Men: 3                    | 18-31: 7<br>46-59: 3<br>60-79: 2                               | Natural: 12                               |
| Croatia    | 14  | 1.2  | Mediterranean Europe | English: 14               | Women: 12<br>Men: 2                   | 32-45: 9<br>46-59: 4<br>60-79: 1                               | Natural: 11<br>Urban park: 2<br>Other: 1  |
| France     | 69  | 6.0  | Mediterranean Europe | French: 69                | Women: 53<br>Men: 15<br>Non-binary: 1 | 18-31: 4<br>32-45: 25<br>46-59: 21<br>60-79: 18<br>Unknown: 1  | Natural: 63<br>Urban park: 4<br>Other: 2  |
| Germany    | 10  | 0.9  | Northwest Europe     | English: 10               | Women: 4<br>Men: 5<br>Non-binary: 1   | 18-31: 3<br>32-45: 7                                           | Natural: 5<br>Urban park: 5               |
| Greece     | 1   | 0.1  | Mediterranean Europe | English: 1                | Women: 1                              | 46-59: 1                                                       | Natural: 1                                |

| Country     | N   | %   | World Area           | Language                                 | Gender                                | Age                                                            | Setting                                   |
|-------------|-----|-----|----------------------|------------------------------------------|---------------------------------------|----------------------------------------------------------------|-------------------------------------------|
| India       | 20  | 1.8 | Asia                 | English: 20                              | Women: 19<br>Men: 1                   | 32-45: 13<br>46-59: 6<br>Unknown: 1                            | Natural: 3<br>Urban park: 10<br>Other: 7  |
| Ireland     | 13  | 1.1 | Northwest Europe     | English: 13                              | Women: 10<br>Men: 3                   | 18-31:<br>32-45: 4<br>46-59: 3<br>60-79: 5<br>Unknown: 1       | Natural: 7<br>Urban park: 4<br>Other: 2   |
| Italy       | 111 | 9.7 | Mediterranean Europe | Italian: 110<br>English: 1               | Women: 84<br>Men: 27                  | 18-31: 16<br>32-45: 28<br>46-59: 51<br>60-79: 13<br>Unknown: 3 | Natural: 93<br>Urban park: 14<br>Other: 4 |
| Latvia      | 29  | 2.5 | Northwest Europe     | English: 29                              | Women: 22<br>Men: 7                   | 18-31: 14<br>32-45: 12<br>46-59: 2<br>Unknown: 1               | Natural: 29                               |
| Lithuania   | 22  | 1.9 | Northwest Europe     | English: 22                              | Women: 16<br>Men: 6                   | 18-31: 11<br>32-45: 7<br>46-59: 2<br>60-79: 1<br>Unknown: 1    | Natural: 15<br>Urban park: 5<br>Other: 2  |
| Luxembourg  | 2   | 0.2 | Northwest Europe     | English: 1<br>Polish: 1                  | Women: 2                              | 32-45: 2                                                       | Natural: 2                                |
| Mexico      | 45  | 3.9 | Latin America        | Spanish: 45                              | Women: 29<br>Men: 15<br>Non-binary: 1 | 18-31: 8<br>32-45: 15<br>46-59: 14<br>60-79: 8                 | Natural: 33<br>Urban park: 12             |
| Morocco     | 3   | 0.3 | Other                | English: 3                               | Men: 3                                | 46-59: 3                                                       | Natural: 3                                |
| Netherlands | 34  | 3.0 | Northwest Europe     | Portuguese:<br>Italian: 9<br>English: 25 | Women: 30<br>Men: 4                   | 18-31: 16<br>32-45: 9<br>46-59: 8<br>60-79: 1                  | Natural: 20<br>Urban park: 14             |
| Peru        | 14  | 1.2 | Latin America        | Spanish: 14                              | Women: 12<br>Men: 2                   | 18-31: 3<br>32-45: 2<br>46-59: 8<br>60-79: 1                   | Natural: 8<br>Urban park: 4<br>Other: 2   |
| Philippines | 1   | 0.1 | Asia                 | Spanish: 1                               | Women: 1                              | 46-59: 1                                                       | Other: 1                                  |
| Poland      | 35  | 3.1 | Northwest Europe     | English: 5<br>Polish: 30                 | Women: 28<br>Men: 7                   | 18-31: 6<br>32-45: 22<br>46-59: 4<br>60-79: 2<br>Unknown: 1    | Natural: 30<br>Urban park: 5              |
| Portugal    | 33  | 2.9 | Mediterranean Europe | Portuguese: 33                           | Women: 24<br>Men: 9                   | 32-45: 7<br>46-59: 17<br>60-79: 9                              | Natural: 19<br>Urban park: 13<br>Other: 1 |
| Romania     | 22  | 1.9 | Northwest Europe     | English: 22                              | Women: 22                             | 32-45: 21<br>60-79: 1                                          | Natural: 1<br>Urban park: 21              |

| Country        | N           | %          | World Area           | Language                   | Gender                                 | Age                                                            | Setting                                    |
|----------------|-------------|------------|----------------------|----------------------------|----------------------------------------|----------------------------------------------------------------|--------------------------------------------|
| Slovenia       | 2           | 0.2        | Northwest Europe     | English: 2                 | Women: 1<br>Men: 1                     | 32-45: 2                                                       | Natural: 1<br>Urban park: 1                |
| South Africa   | 4           | 0.4        | Other                | English: 4                 | Women: 3<br>Men: 1                     | 18-31: 2<br>46-59: 1<br>60-79: 1                               | Natural: 2<br>Urban park: 2                |
| Spain          | 188         | 16.5       | Mediterranean Europe | Spanish: 187<br>English: 1 | Women: 138<br>Men: 46<br>Non-binary: 4 | 18-31: 14<br>32-45: 69<br>46-59: 64<br>60-79: 40<br>Unknown: 1 | Natural: 182<br>Urban park: 3<br>Other: 3  |
| Sweden         | 4           | 0.4        | Northwest Europe     | English: 4                 | Women: 3<br>Non-binary: 1              | 32-45: 3<br>60-79: 1                                           | Natural: 2<br>Urban park: 2                |
| Switzerland    | 10          | 0.9        | Northwest Europe     | French: 6<br>Italian: 4    | Women: 6<br>Men: 4                     | 32-45: 7<br>46-59: 3                                           | Natural: 10                                |
| United Kingdom | 39          | 3.4        | Northwest Europe     | English: 39                | Women: 23<br>Men: 16                   | 18-31: 4<br>32-45: 1<br>46-59: 25<br>60-79: 9                  | Natural: 30<br>Urban park: 9               |
| United States  | 116         | 10.2       | North America        | Spanish: 1<br>English: 115 | Women: 95<br>Men: 20<br>Non-binary: 1  | 18-31: 18<br>32-45: 22<br>46-59: 35<br>60-79: 39<br>Unknown: 2 | Natural: 55<br>Urban park: 40<br>Other: 21 |
| Uruguay        | 2           | 0.2        | Latin America        | Spanish: 2                 | Women: 2                               | 32-45: 1<br>60-79: 1                                           | Urban park: 2                              |
| <b>Total</b>   | <b>1142</b> | <b>100</b> |                      |                            |                                        |                                                                |                                            |

**Table S3.** Detailed data for the six categories of the world area factor. We include information for native language, gender and age of the respondents, and setting where the activity was performed.

| World area           | N           | %          | Language       | Gender        | Age        | Setting        |
|----------------------|-------------|------------|----------------|---------------|------------|----------------|
| Latin America        | 310         | 27.1       | Portuguese: 14 | Women: 220    | 18-31: 81  | Natural: 234   |
|                      |             |            | Spanish: 283   | Men: 88       | 32-45: 100 | Urban park: 67 |
|                      |             |            | English: 13    | Non-binary: 2 | 46-59: 79  | Other: 9       |
|                      |             |            |                |               | 60-79: 49  |                |
|                      |             |            |                |               | Unknown: 1 |                |
| North America        | 144         | 12.6       | Spanish: 1     | Women: 119    | 18-31: 24  | Natural: 67    |
|                      |             |            | English: 143   | Men: 24       | 32-45: 26  | Urban park: 56 |
|                      |             |            |                | Non-binary: 1 | 46-59: 44  | Other: 21      |
|                      |             |            |                |               | 60-79: 45  |                |
|                      |             |            |                |               | Unknown: 5 |                |
| Asia                 | 31          | 2.7        | English: 31    | Women: 27     | 18-31: 1   | Natural: 11    |
|                      |             |            |                | Men: 4        | 32-45: 21  | Urban park: 12 |
|                      |             |            |                |               | 46-59: 7   | Other: 8       |
|                      |             |            |                |               | Unknown: 2 |                |
| Mediterranean Europe | 425         | 37.2       | Portuguese: 33 | Women: 316    | 18-31: 40  | Natural: 378   |
|                      |             |            | Spanish: 187   | Men: 104      | 32-45: 140 | Urban park: 36 |
|                      |             |            | French: 69     | Non-binary: 5 | 46-59: 159 | Other: 11      |
|                      |             |            | Italian: 114   |               | 60-79: 81  |                |
|                      |             |            | English: 22    |               | Unknown: 5 |                |
| Northwest Europe     | 225         | 19.7       | French: 6      | Women: 169    | 18-31: 54  | Natural: 155   |
|                      |             |            | Italian: 13    | Men: 54       | 32-45: 98  | Urban park: 66 |
|                      |             |            | English: 175   | Non-binary: 2 | 46-59: 48  | Other: 4       |
|                      |             |            | Polish: 31     |               | 60-79: 21  |                |
|                      |             |            |                |               | Unknown: 4 |                |
| Other                | 7           | 0.6        | English: 7     | Women: 3      | 18-31: 2   | Natural: 5     |
|                      |             |            |                | Men: 4        | 46-59: 4   | Urban park: 2  |
|                      |             |            |                |               | 60-79: 1   |                |
| <b>Total</b>         | <b>1142</b> | <b>100</b> |                |               |            |                |

**Table S4.** Spearman rho correlations between indicators for wellbeing (column names) and natural elements perceived during the forest bathing session (row names). Correlations higher than 0.33 (overall median) were highlighted in green color.

|                    | <i>Happy</i> | <i>Calm</i> | <i>Important</i> | <i>Trust</i> | <i>Hope</i> | <i>Surprise</i> | <i>INS_Nature</i> | <b>Median</b> |
|--------------------|--------------|-------------|------------------|--------------|-------------|-----------------|-------------------|---------------|
| <i>sounds</i>      | 0.34         | 0.26        | 0.20             | 0.32         | 0.33        | 0.26            | 0.28              | <b>0.28</b>   |
| <i>uniqueness</i>  | 0.41         | 0.30        | 0.26             | 0.40         | 0.46        | 0.31            | 0.39              | <b>0.39</b>   |
| <i>contact</i>     | 0.43         | 0.30        | 0.29             | 0.39         | 0.45        | 0.33            | 0.43              | <b>0.39</b>   |
| <i>positive</i>    | 0.39         | 0.28        | 0.28             | 0.40         | 0.44        | 0.32            | 0.37              | <b>0.37</b>   |
| <i>landscape</i>   | 0.31         | 0.22        | 0.23             | 0.32         | 0.35        | 0.27            | 0.32              | <b>0.31</b>   |
| <i>harmony</i>     | 0.40         | 0.31        | 0.28             | 0.41         | 0.46        | 0.35            | 0.48              | <b>0.40</b>   |
| <i>colours</i>     | 0.31         | 0.22        | 0.20             | 0.36         | 0.38        | 0.29            | 0.38              | <b>0.31</b>   |
| <i>discovering</i> | 0.37         | 0.24        | 0.28             | 0.37         | 0.40        | 0.39            | 0.34              | <b>0.37</b>   |
| <i>scents</i>      | 0.31         | 0.22        | 0.22             | 0.33         | 0.35        | 0.28            | 0.37              | <b>0.31</b>   |
| <i>home</i>        | 0.36         | 0.26        | 0.26             | 0.36         | 0.41        | 0.30            | 0.43              | <b>0.36</b>   |
| <i>textures</i>    | 0.30         | 0.23        | 0.24             | 0.37         | 0.40        | 0.33            | 0.41              | <b>0.33</b>   |
| <i>meteorology</i> | 0.31         | 0.23        | 0.23             | 0.32         | 0.36        | 0.31            | 0.33              | <b>0.31</b>   |
| <i>shines</i>      | 0.30         | 0.24        | 0.23             | 0.36         | 0.39        | 0.31            | 0.36              | <b>0.31</b>   |
| <i>shapes</i>      | 0.31         | 0.21        | 0.29             | 0.35         | 0.39        | 0.34            | 0.39              | <b>0.34</b>   |
| <i>sharing</i>     | 0.36         | 0.23        | 0.32             | 0.33         | 0.43        | 0.33            | 0.36              | <b>0.33</b>   |
| <i>animals</i>     | 0.21         | 0.15        | 0.23             | 0.23         | 0.27        | 0.26            | 0.25              | <b>0.23</b>   |
| <b>Median</b>      | <b>0.33</b>  | <b>0.24</b> | <b>0.25</b>      | <b>0.36</b>  | <b>0.40</b> | <b>0.31</b>     | <b>0.37</b>       | <b>0.33</b>   |





**Table S6.** Detailed  $p$ -values obtained in the Kruskal-Wallis tests computed on the 23 indicators for wellbeing and natural elements perceived (row names), by the sociodemographic and temporal factors (column names). Significant  $p$ -values were highlighted in green color ( $\alpha = 0.05$ ).

|                    | Gender | Age   | Setting | N Walk | World Area | Season | Month Week | Week Day |
|--------------------|--------|-------|---------|--------|------------|--------|------------|----------|
| <i>Happy</i>       | 0.000  | 0.330 | 0.011   | 0.938  | 0.000      | 0.439  | 0.794      | 0.742    |
| <i>Calm</i>        | 0.078  | 0.240 | 0.263   | 0.645  | 0.001      | 0.046  | 0.497      | 0.467    |
| <i>Important</i>   | 0.933  | 0.023 | 0.002   | 0.964  | 0.000      | 0.209  | 0.109      | 0.988    |
| <i>Trust</i>       | 0.019  | 0.152 | 0.014   | 0.570  | 0.000      | 0.020  | 0.821      | 0.763    |
| <i>Hope</i>        | 0.000  | 0.165 | 0.017   | 0.269  | 0.000      | 0.026  | 0.276      | 0.712    |
| <i>Surprise</i>    | 0.094  | 0.450 | 0.071   | 0.669  | 0.000      | 0.116  | 0.475      | 0.772    |
| <i>INS_Nature</i>  | 0.035  | 0.000 | 0.000   | 0.570  | 0.000      | 0.001  | 0.641      | 0.556    |
| <i>sounds</i>      | 0.000  | 0.461 | 0.048   | 0.964  | 0.000      | 0.027  | 0.383      | 0.954    |
| <i>uniqueness</i>  | 0.000  | 0.932 | 0.019   | 0.328  | 0.000      | 0.285  | 0.676      | 0.697    |
| <i>contact</i>     | 0.000  | 0.340 | 0.017   | 0.930  | 0.000      | 0.140  | 0.775      | 0.191    |
| <i>positive</i>    | 0.000  | 0.847 | 0.003   | 0.833  | 0.000      | 0.000  | 0.689      | 0.243    |
| <i>landscape</i>   | 0.000  | 0.302 | 0.001   | 0.063  | 0.000      | 0.004  | 0.100      | 0.424    |
| <i>harmony</i>     | 0.000  | 0.230 | 0.041   | 0.962  | 0.000      | 0.000  | 0.997      | 0.332    |
| <i>colours</i>     | 0.000  | 0.549 | 0.057   | 0.234  | 0.000      | 0.000  | 0.181      | 0.333    |
| <i>discovering</i> | 0.000  | 0.457 | 0.031   | 0.913  | 0.000      | 0.116  | 0.872      | 0.383    |
| <i>scents</i>      | 0.001  | 0.389 | 0.131   | 0.725  | 0.000      | 0.007  | 0.672      | 0.677    |
| <i>home</i>        | 0.000  | 0.393 | 0.025   | 0.995  | 0.000      | 0.169  | 0.321      | 0.714    |
| <i>textures</i>    | 0.000  | 0.723 | 0.097   | 0.823  | 0.000      | 0.077  | 0.780      | 0.581    |
| <i>meteorology</i> | 0.000  | 0.918 | 0.003   | 0.440  | 0.000      | 0.266  | 0.253      | 0.937    |
| <i>shines</i>      | 0.000  | 0.931 | 0.060   | 0.612  | 0.000      | 0.365  | 0.706      | 0.400    |
| <i>shapes</i>      | 0.008  | 0.299 | 0.000   | 0.812  | 0.000      | 0.036  | 0.114      | 0.353    |
| <i>sharing</i>     | 0.000  | 0.351 | 0.018   | 0.529  | 0.000      | 0.033  | 0.379      | 0.696    |
| <i>animals</i>     | 0.023  | 0.017 | 0.001   | 0.261  | 0.000      | 0.077  | 0.118      | 0.207    |

**Figures S1–S4.** Sociodemographic patterns found within the dataset. The entire set of 23 indicators for wellbeing and natural elements perceived during the forest bathing session is drawn in bar graphs, by the sociodemographic factors which had showed strong patterns: gender (Figure S1), setting (Figure S2), world area (Figure S3) and season (Figure S4). Upper bars lines show the mean score, and error bars represent the 95% CI to visually reveal statistical differences among categories. Sample sizes are given at the bars base. The *p*-values obtained in the Kruskal-Wallis tests are shown below the indicator name (green= significant, red= non-significant). For this representation, the nature connection indicator INS was rescaled from 0-6 to 1-10 to bring it to a similar range of the other indicators (INS\_Nature\_R). Detailed *p*-values of Kruskal-Wallis analyses for all indicators by all factors can be seen in the Table S6.

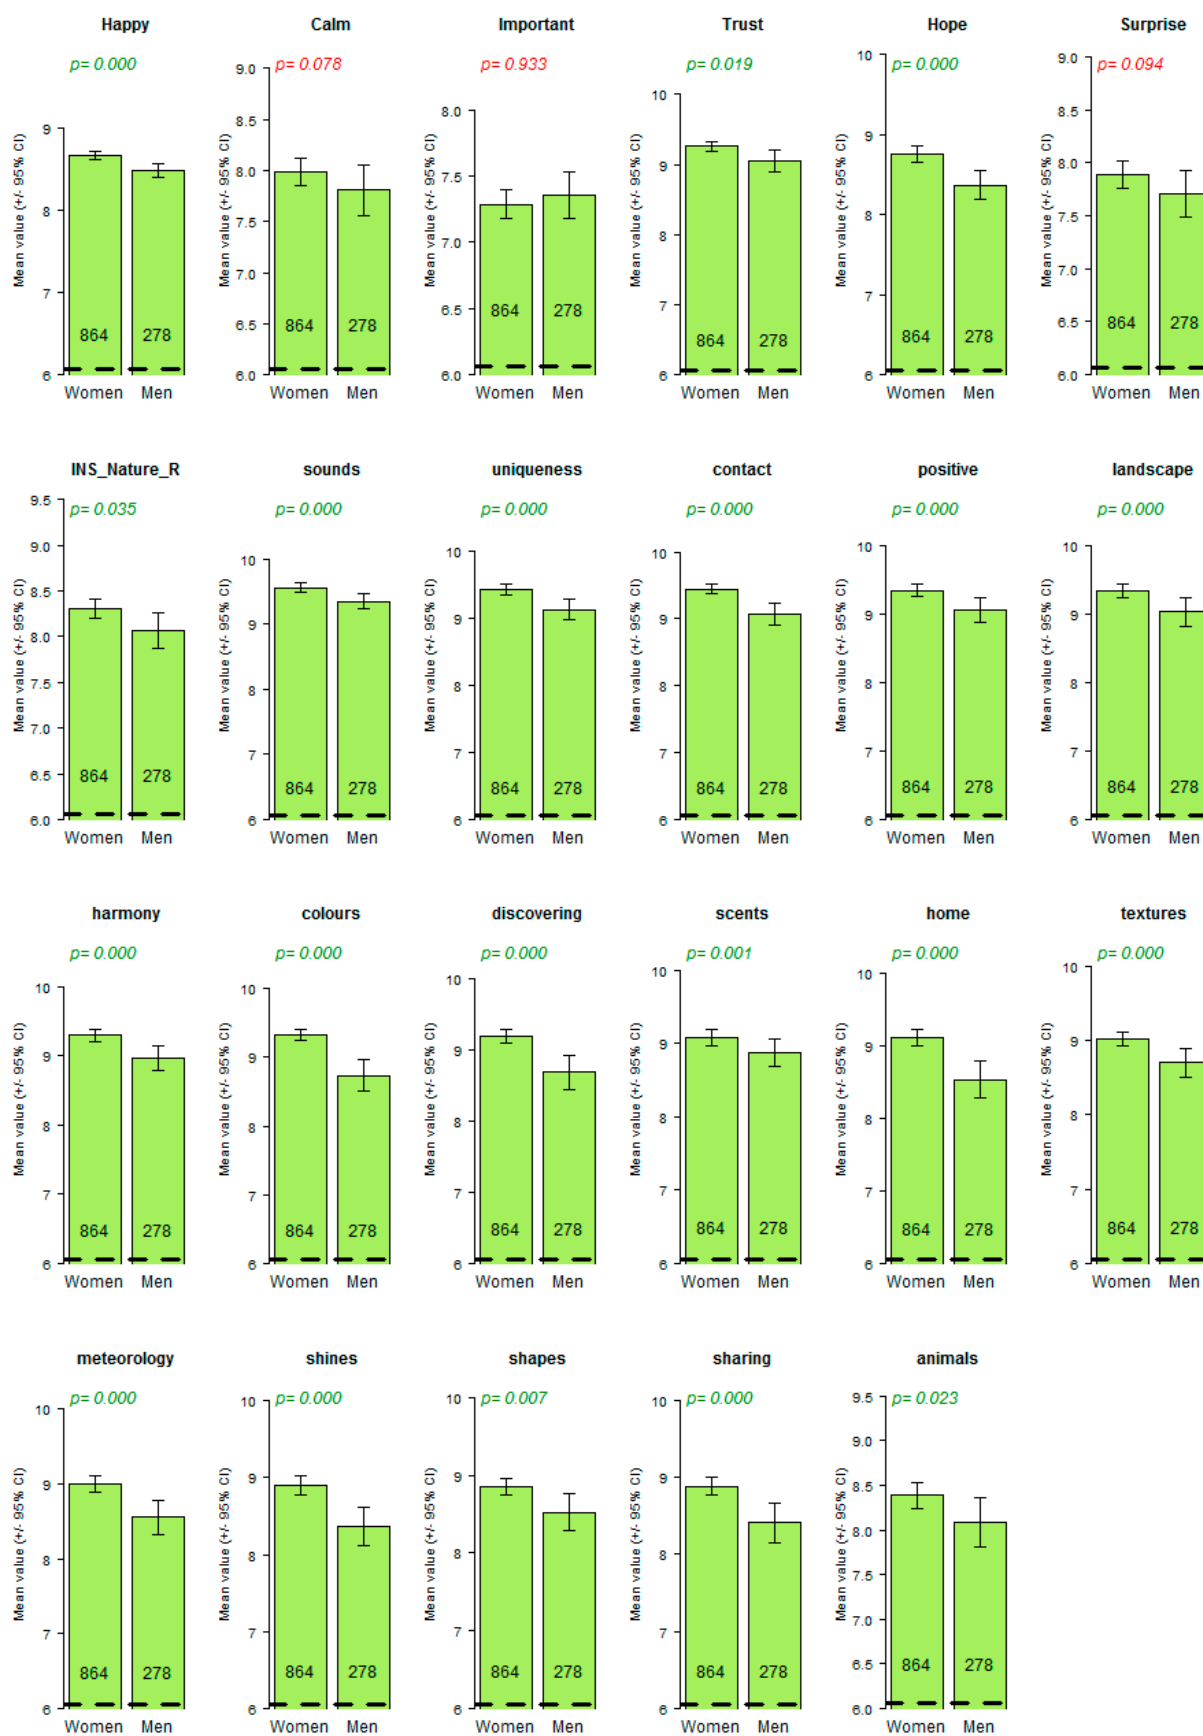

Figure S1. Bar graphs for the 23 indicators by sociodemographic factor gender.

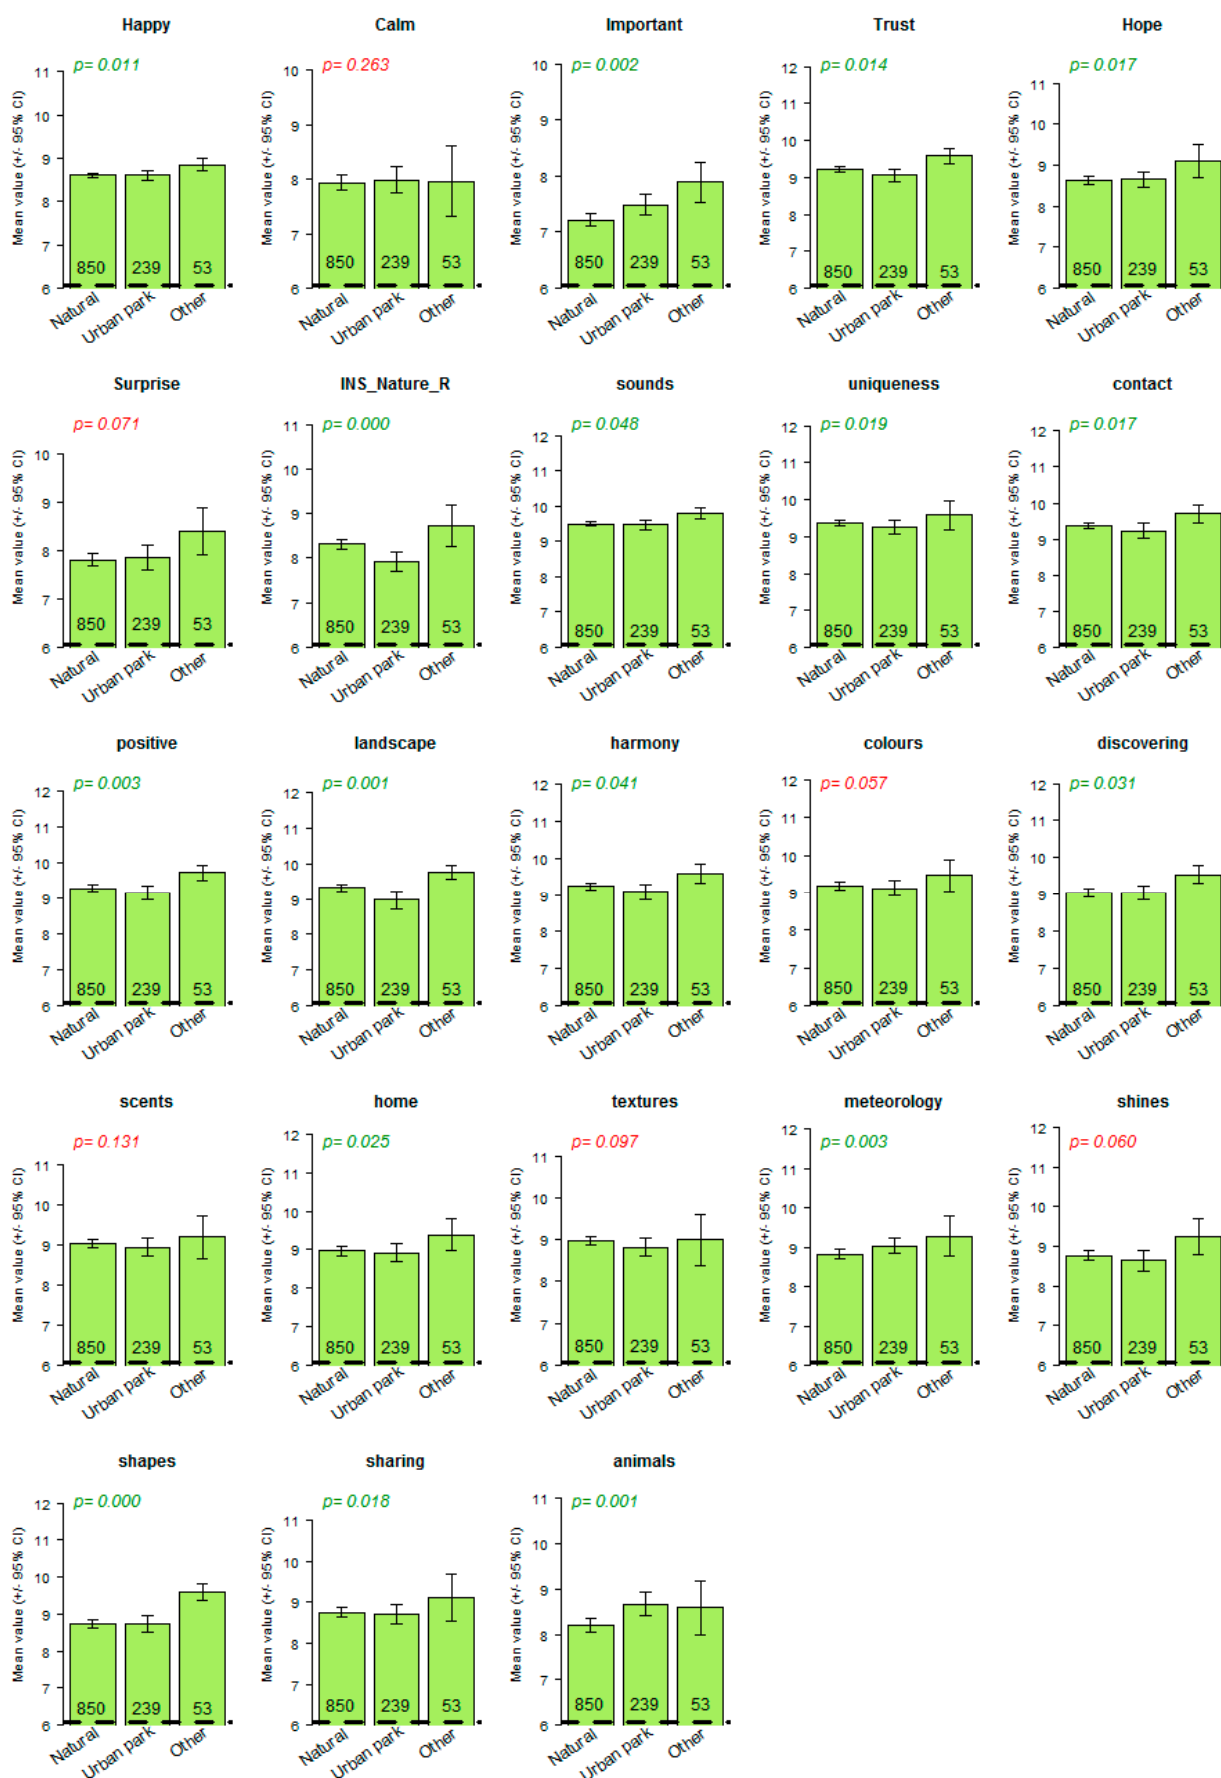

Figure S2. Bar graphs for the 23 indicators by sociodemographic factor setting.

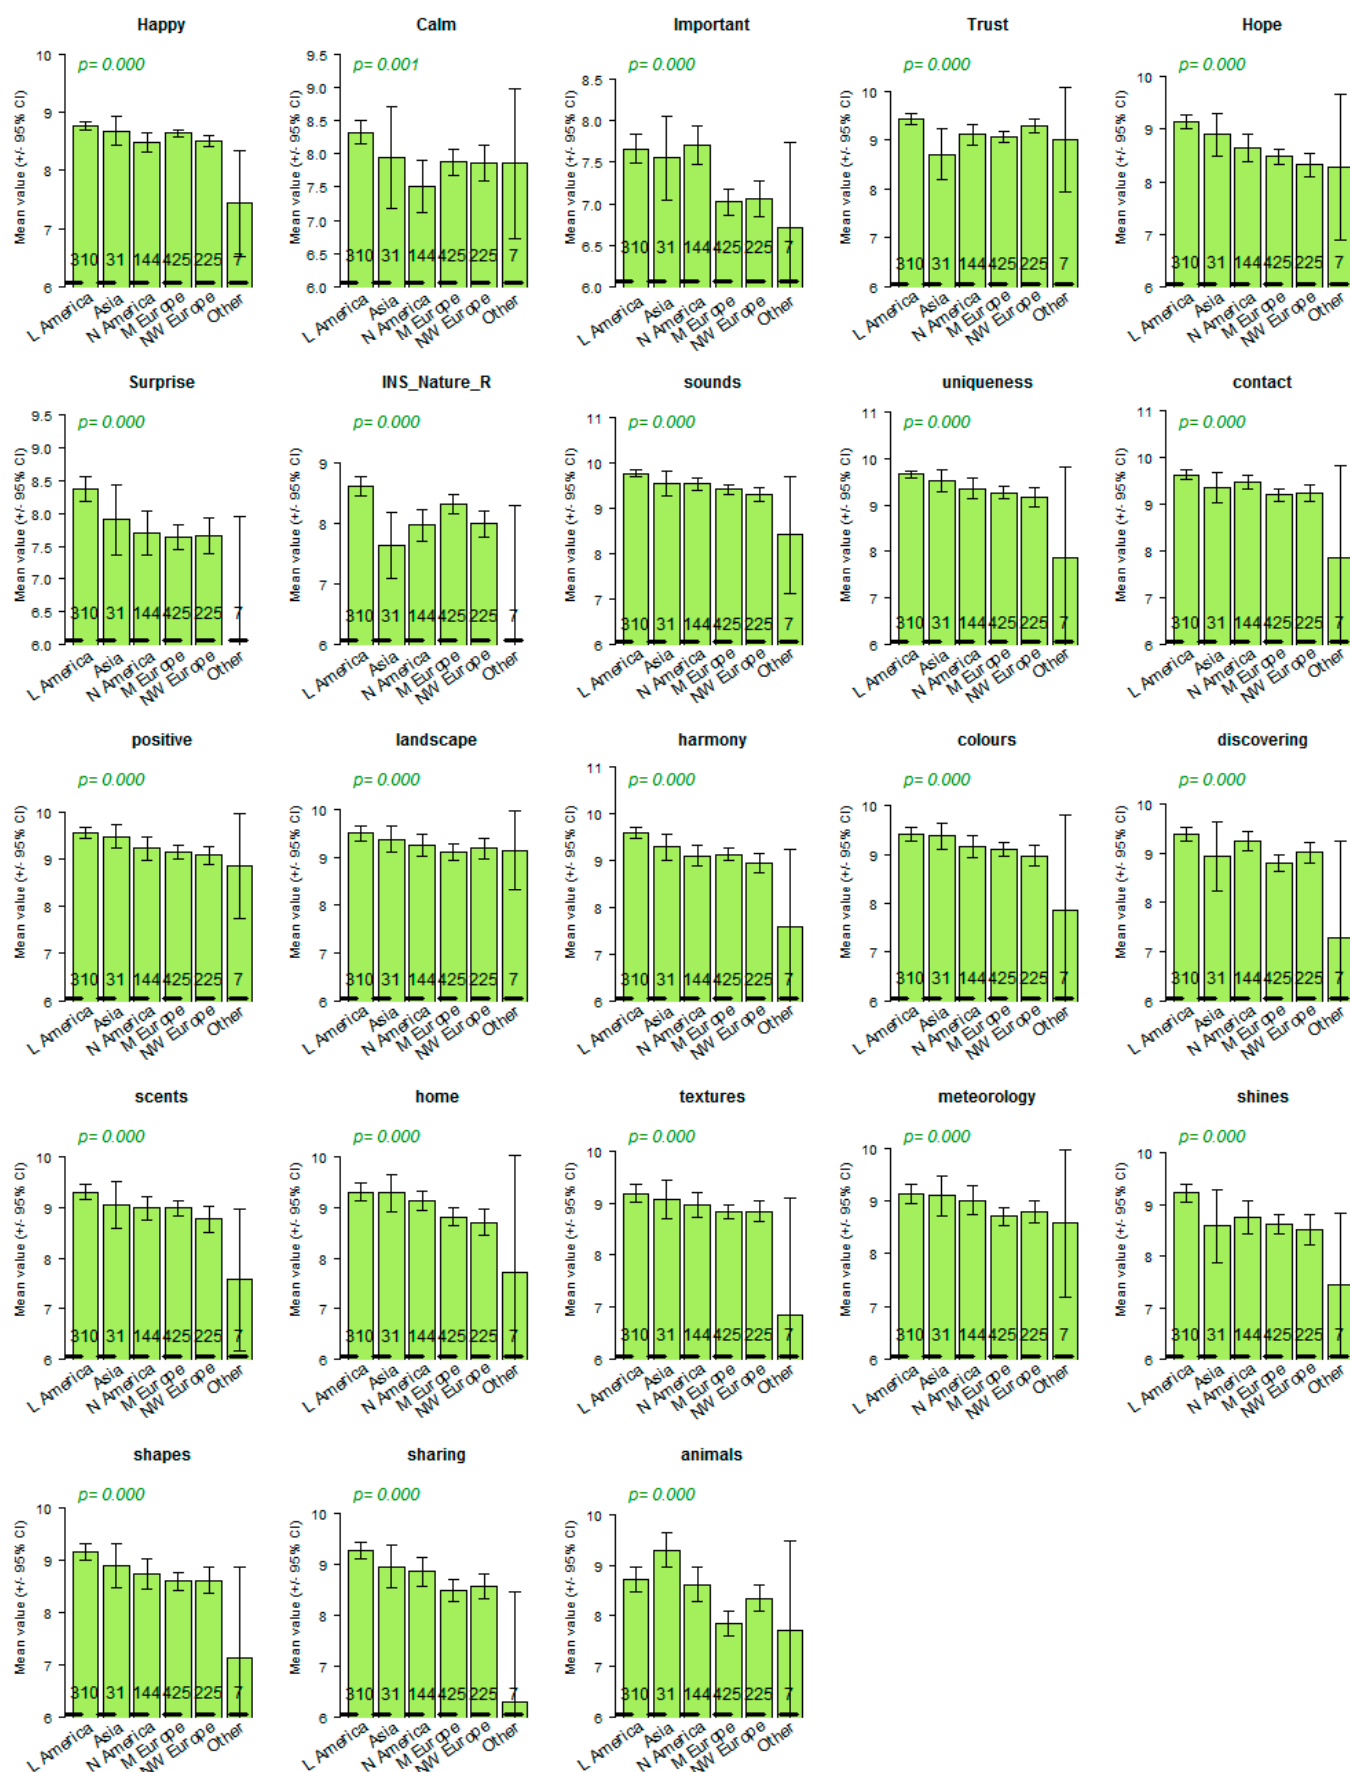

Figure S3. Bar graphs for the 23 indicators by sociodemographic factor world area.

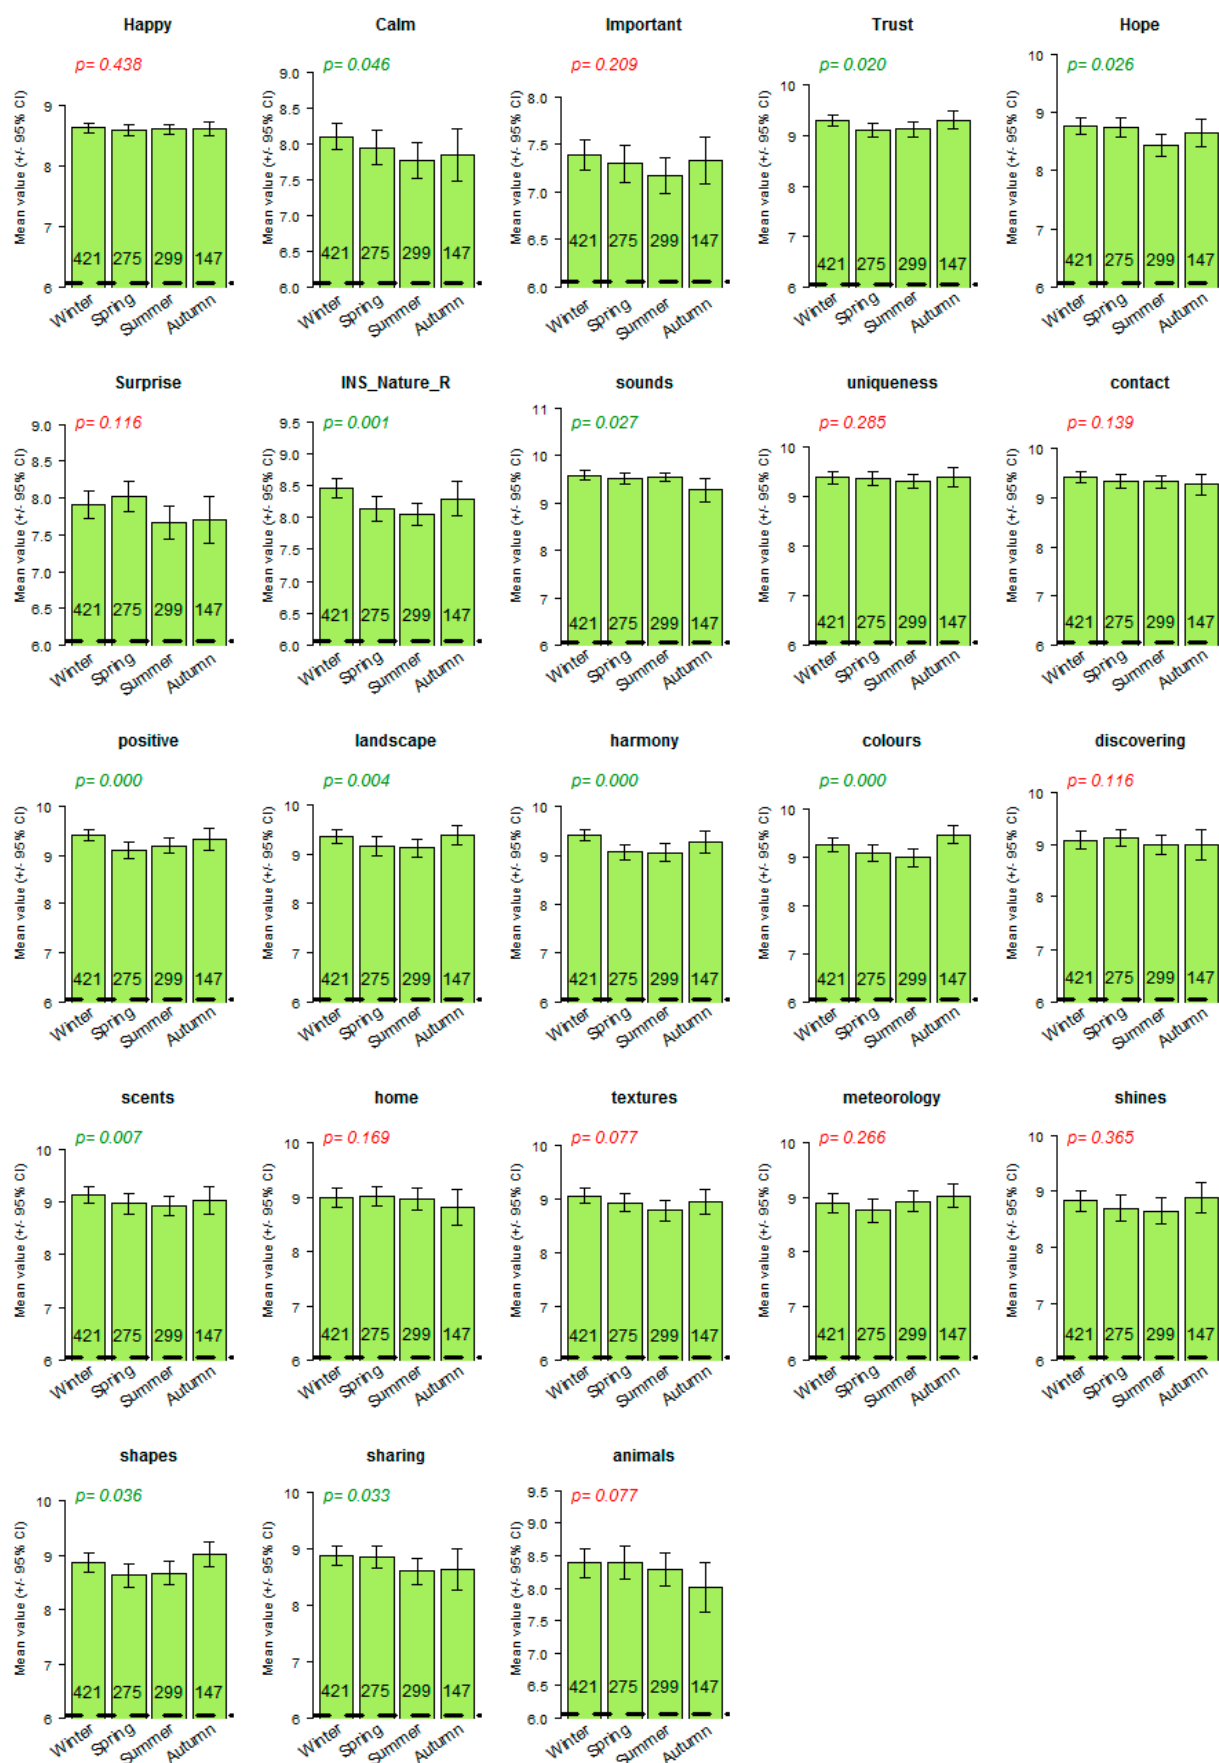

Figure S4. Bar graphs for the 23 indicators by sociodemographic factor season.
